# Supplementary material for: Three-dimensional hierarchical self-supported NiCo2O4/carbon nanotube core–shell networks as high performance supercapacitor electrodes
Source: Royal Society of Chemistry journal article supplement (doi:10.1039/c4ra09048a), 2014-12-23
Supplement: c4ra09048a1.pdf [file c4ra09048a1.pdf]

# **Three-dimensional Hierarchical Self-Supported NiCo<sub>2</sub>O<sub>4</sub> Carbon Nanotube Core-Shell Networks as High Performance Supercapacitor Electrodes**

*Xiaocheng Li<sup>a\*</sup>, Wei Sun<sup>a, b</sup>, Liqun Wang<sup>a, c</sup>, Yongdong Qi<sup>a, b</sup>, Tieming Guo<sup>c</sup>, Xinhong Zhao<sup>b</sup>, Xingbin Yan<sup>a</sup>.*

*<sup>a</sup>Laboratory of Clean Energy Chemistry and Materials, Lanzhou Institute of Chemical Physics, Chinese Academy of Sciences, Lanzhou 730000, P. R. China*

*<sup>b</sup>School of petrochemical engineering, Lanzhou University of Technology, Lanzhou 730050, P. R. China. <sup>c</sup>State Key Laboratory of Advanced Processing and Recycling of Nonferrous Materials, Lanzhou University of Technology, Lanzhou 730050, P. R.*

*China*

---

\*Corresponding author. Tel./fax: +86-931-4968040; Email: xiaocheng@licp.cas.cn

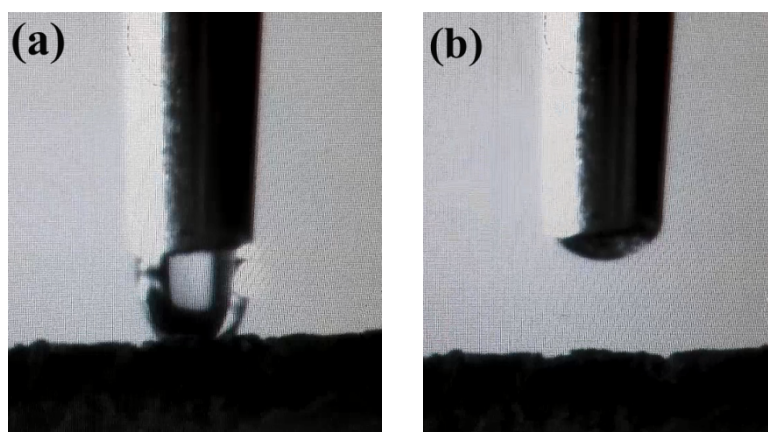

Figure S1 Camera-captured image of water droplet on CNT/NF substrate before and after air plasma treatment: a) before and b) after air plasma treatment. In both two cases, it is difficult to measure the contact angle of water droplet on pristine CNT/NF substrate and air plasma-treated CNT/NF substrate due to the highly porous feature of CNT/NF substrate. However, we can distinguish their subtle difference in wetting ability. For pristine CNT/NF substrate, the water droplet can slowly approaches to it and then spread along the sample surface. Figure S1a is the camera-captured image of water droplet as it contact with the pristine CNT/NF substrate, indicating a moderate wetting ability. After treated by air plasma, the water droplet instantly penetrates into CNT/NF substrate and immediately disappears, indicating its excellent wetting ability.

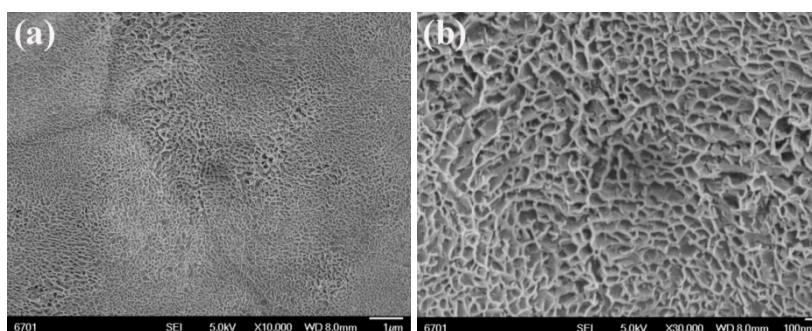

Figure S2 (a) the low and (b) high magnification FESEM images of vertically aligned  $\text{NiCo}_2\text{O}_4$  nanosheets on NF surface.

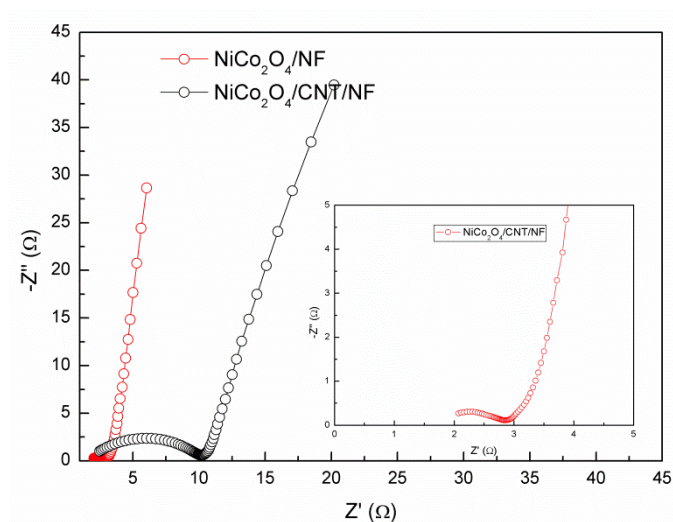

Figure S3 EIS spectra of NiCo<sub>2</sub>O<sub>4</sub>/CNT/NF electrode and NiCo<sub>2</sub>O<sub>4</sub>/NF electrode measured at 0.24 V in an alternating current frequency ranging from 0.01 to  $3 \times 10^4$  Hz with an excitation signal of 5 mV. The inset image is EIS spectrum of NiCo<sub>2</sub>O<sub>4</sub>/CNT/NF electrode at high-/medium frequency region.

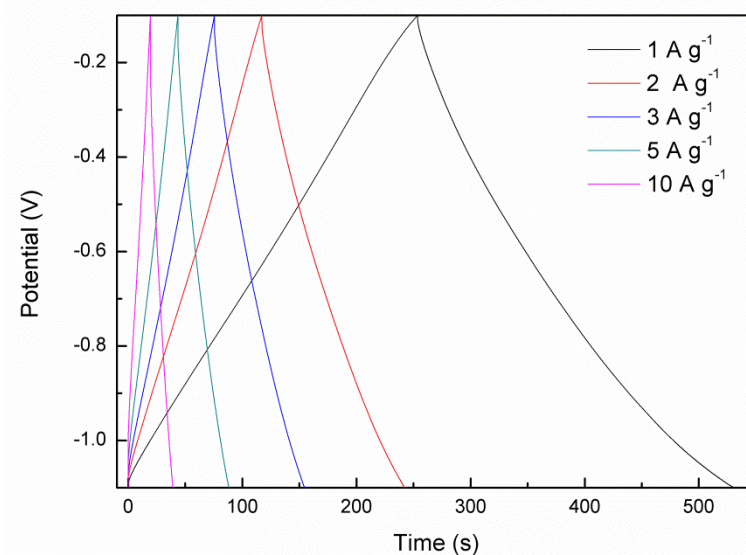

Figure S4 CDC curves of commercial AC at various current densities. The commercial AC electrode demonstrated the capacitance of 275, 250, 237, 222 and 197 F g<sup>-1</sup> at current density of 1, 2, 3, 5, 10 A g<sup>-1</sup>.

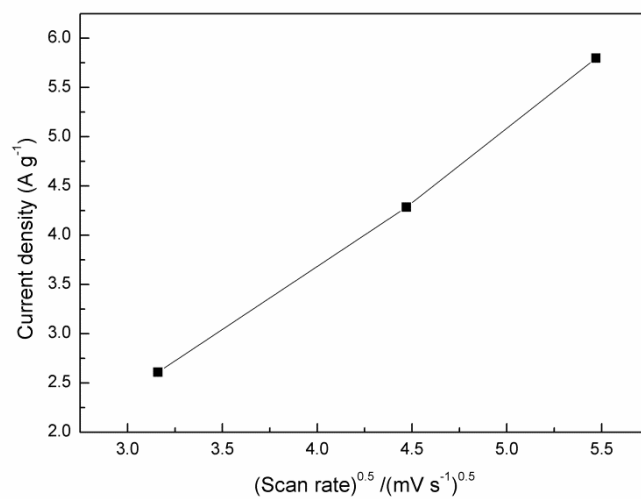

Figure S5 Relationship between the square root of scan rate and current density for assembled asymmetric device.

Table S1 Comparison of the electrochemical performance of the as-prepared NiCo<sub>2</sub>O<sub>4</sub>/CNT/NF electrode with the reported ones

| Material                                                 | Specific capacitance                               | Rate capability                                   | Cycling stability                                                        | Loading mass                                                    | Electrode process  | Ref.      |
|----------------------------------------------------------|----------------------------------------------------|---------------------------------------------------|--------------------------------------------------------------------------|-----------------------------------------------------------------|--------------------|-----------|
| Porous NiCo <sub>2</sub> O <sub>4</sub>                  | 658 F g <sup>-1</sup><br>(1 A g <sup>-1</sup> )    | 530 F g <sup>-1</sup><br>(10 A g <sup>-1</sup> )  | 98.5%<br>(1000 cycles @ 10 A g <sup>-1</sup> )                           | 1 mg/cm <sup>2</sup>                                            | Slurry and coating | 30        |
| Flower-like NiCo <sub>2</sub> O <sub>4</sub>             | 658 F g <sup>-1</sup><br>(1 A g <sup>-1</sup> )    | 515 F g <sup>-1</sup><br>(20 A g <sup>-1</sup> )  | No observable degradation<br>(10000 cycles at varying current densities) | --                                                              | Slurry and coating | 52        |
| NiCo <sub>2</sub> O <sub>4</sub> nanorods                | 490 F g <sup>-1</sup><br>(2 mA)                    | -                                                 | 7%<br>(1000 cycles @ 2 mA)                                               | 0.3 mg/cm <sup>2</sup>                                          | In situ growth     | 50        |
| NiCo <sub>2</sub> O <sub>4</sub> nanowires               | 245 F g <sup>-1</sup><br>(1 A g <sup>-1</sup> )    | 191 F g <sup>-1</sup><br>(10 A g <sup>-1</sup> )  | 115%<br>(1000 cycles @ 10 A g <sup>-1</sup> )                            | 0.52 mg/cm <sup>2</sup>                                         | In situ growth     | 53        |
| NiCo <sub>2</sub> O <sub>4</sub> nanowires               | 760 F g <sup>-1</sup><br>(1 A g <sup>-1</sup> )    | 532 F g <sup>-1</sup><br>(20 A g <sup>-1</sup> )  | 81%<br>(3000 cycles @ 10 A g <sup>-1</sup> )                             | 1 mg/cm <sup>2</sup>                                            | Slurry and coating | 24        |
| NiCo <sub>2</sub> O <sub>4</sub> /graphene               | 835 F g <sup>-1</sup><br>(1 A g <sup>-1</sup> )    | 635 F g <sup>-1</sup><br>(20 A g <sup>-1</sup> )  | 108%<br>(4000 cycles @ 2 A g <sup>-1</sup> )                             | ~1.68 mg/cm <sup>2</sup><br>(NiCo <sub>2</sub> O <sub>4</sub> ) | Slurry and coating | 54        |
| Nickel Cobalt oxide/SWCNT                                | 1642 F g <sup>-1</sup><br>(0.5 A g <sup>-1</sup> ) | 879 F g <sup>-1</sup><br>(20 A g <sup>-1</sup> )  | 94%<br>(2000 cycles @ 0.5 A g <sup>-1</sup> )                            | 0.5 mg/cm <sup>2</sup>                                          | In situ growth     | 55        |
| Self-standing NiCo <sub>2</sub> O <sub>4</sub> nanosheet | 895 F g <sup>-1</sup><br>(1 A g <sup>-1</sup> )    | 685 F g <sup>-1</sup><br>(20 A g <sup>-1</sup> )  | 73%<br>(2000 cycles @ 5 A g <sup>-1</sup> )                              | 0.54 mg/cm <sup>2</sup>                                         | In situ growth     | 56        |
| NiCo <sub>2</sub> O <sub>4</sub> /vertically aligned CNT | 695 F g <sup>-1</sup><br>(1 A g <sup>-1</sup> )    | 576 F g <sup>-1</sup><br>(20 A g <sup>-1</sup> )  | 91%<br>(1500 cycles @ 4 A g <sup>-1</sup> )                              | 0.62 mg/cm <sup>2</sup>                                         | In situ growth     | 33        |
| NiCo <sub>2</sub> O <sub>4</sub> /CNT                    | 1533 F g <sup>-1</sup><br>(3 A g <sup>-1</sup> )   | 1335 F g <sup>-1</sup><br>(30 A g <sup>-1</sup> ) | 102% (2500 cycles @ 3, 5, 10, 3 A g <sup>-1</sup> )                      | 0.78 mg/cm <sup>2</sup>                                         | In situ growth     | This work |
